# Supplementary material for: Long‐term monitoring of tropical alpine habitat change, Andean anurans, and chytrid fungus in the Cordillera Vilcanota, Peru: Results from a decade of study
Source: PubMed Central journal article supplement (PMC5330894; doi:10.1002/ece3.2779), 2017-02-07
Supplement: ECE3-7-1527-s001.pdf [file ECE3-7-1527-s001.pdf]

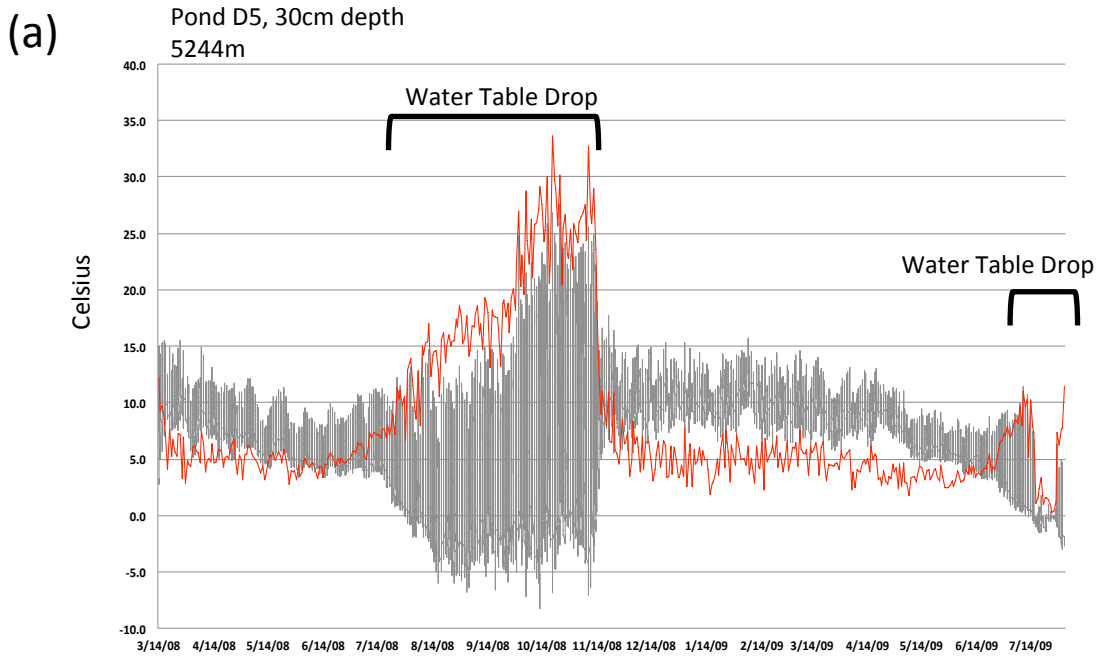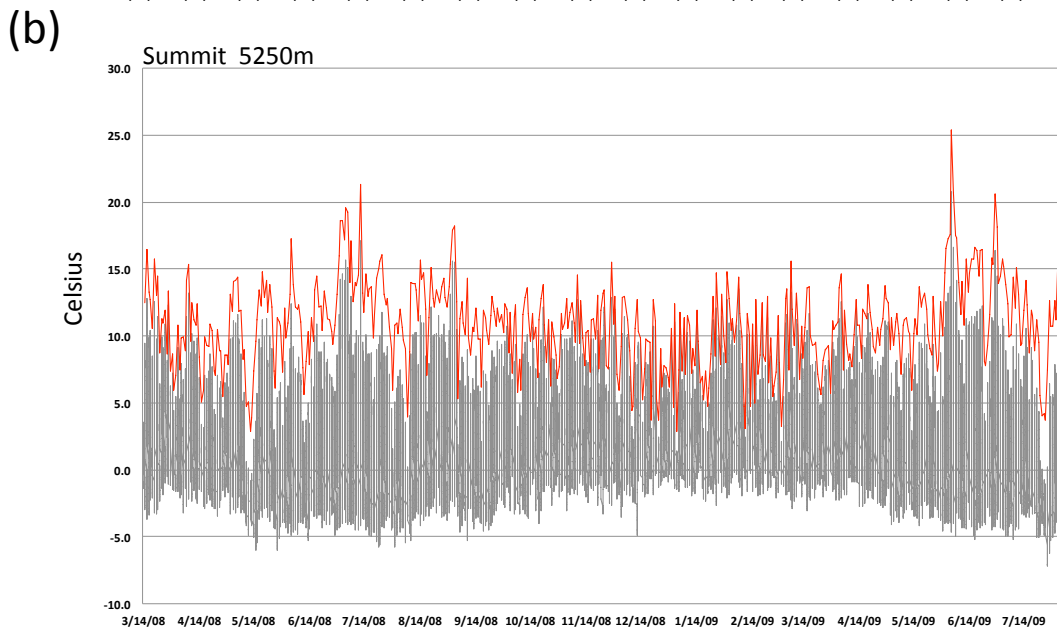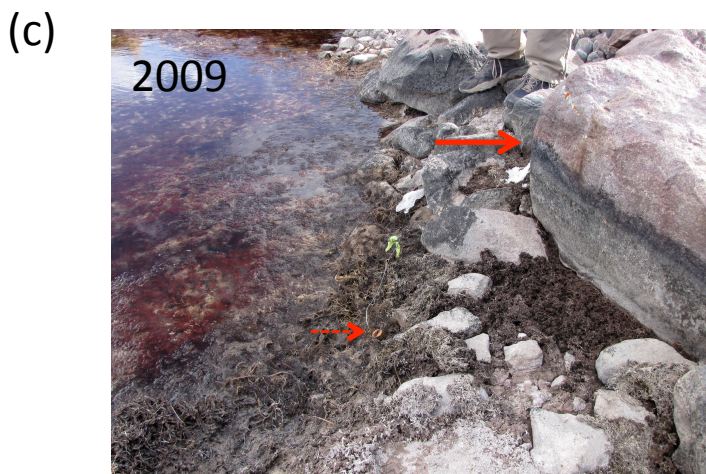

Fig S1
