# Supplementary material for: Long‐term monitoring of tropical alpine habitat change, Andean anurans, and chytrid fungus in the Cordillera Vilcanota, Peru: Results from a decade of study
Source: PubMed Central journal article supplement (PMC5330894; doi:10.1002/ece3.2779), 2017-02-07

(a)

*P. marmoratum*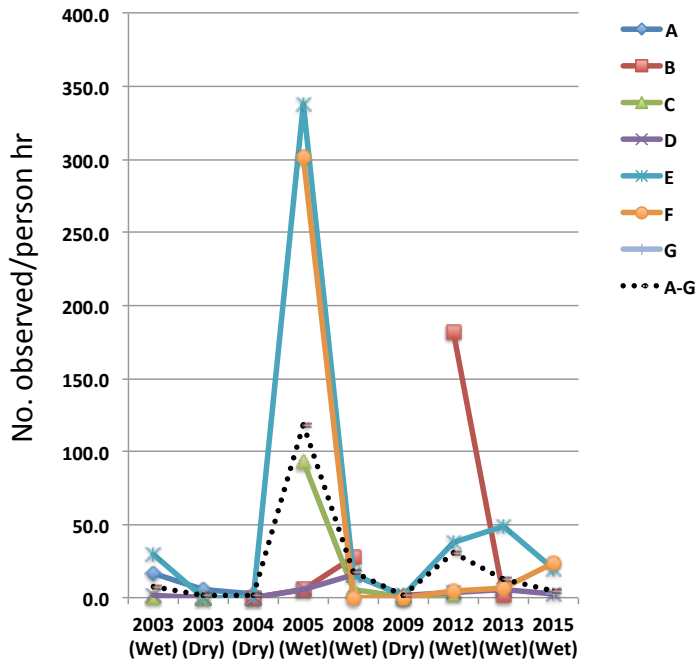

(b)

*T. marmoratus*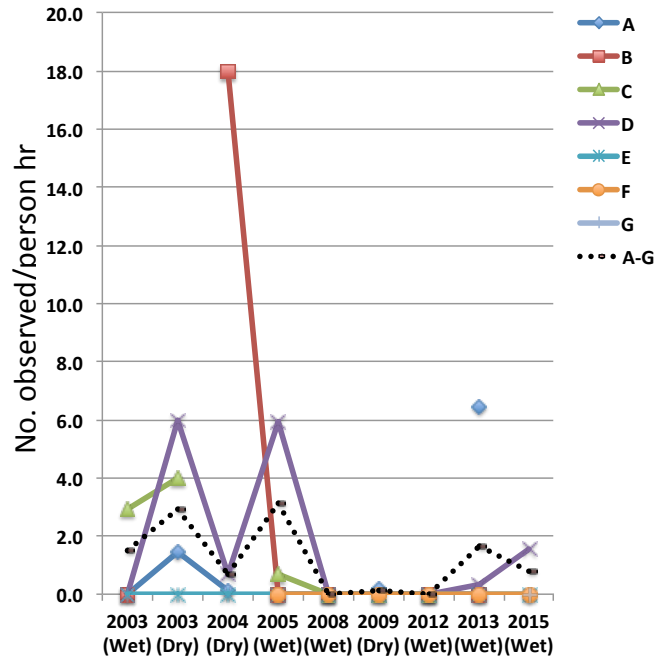

(c)

*R. spinulosa*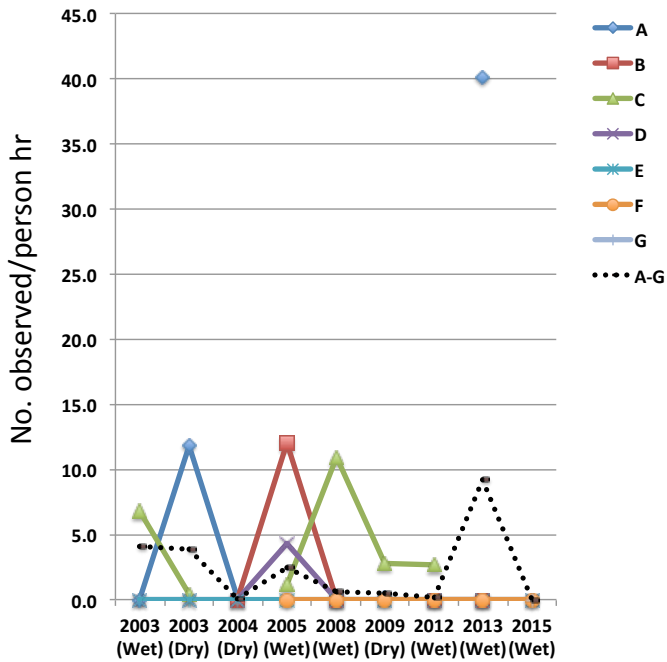

(d)

Amount of effort

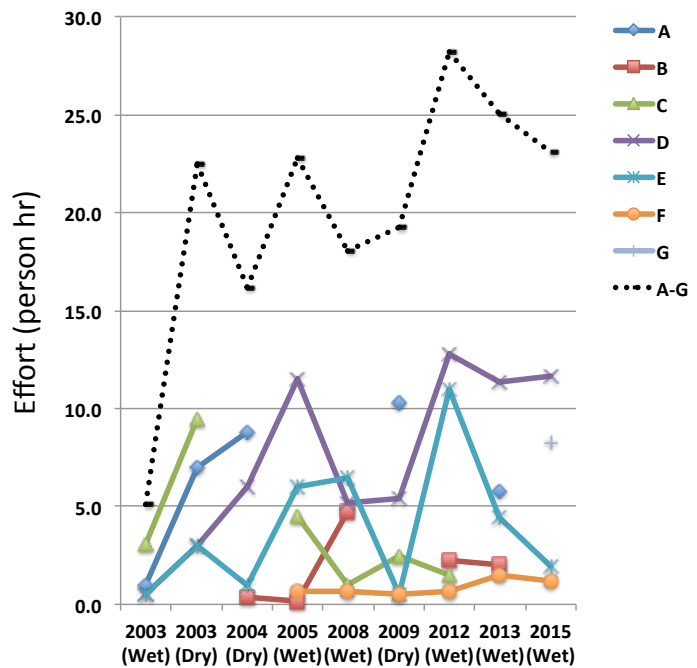

Supplement: ECE3-7-1527-s002.pdf [file ECE3-7-1527-s002.pdf]
